# Supplementary material for: Role of Gas6 in erythropoiesis and anemia in mice
Source: JCI journal article supplement (doi:10.1172/jci30375), 2008-01-10
Supplement: sd1 [file 1]

## SUPPLEMENTARY INFORMATION

**SUPPLEMENTARY NOTE 1:** Reticulocyte maturation, measured by the intensity of fluorescence (56), was normal in *Gas6*<sup>-/-</sup> mice. The proportion of immature reticulocytes with a high fluorescence versus mature reticulocytes with an intermediate or low fluorescence were, respectively, 12 ± 0.4% and 89 ± 1.9% in WT mice versus 11 ± 1.1% and 88 ± 0.6% in *Gas6*<sup>-/-</sup> mice ( $n = 3$ ,  $P = \text{NS}$ ).

**SUPPLEMENTARY NOTE 2:** RBCs were biotinylated *in vivo*. At 5 and 8 days after injection of the 34-3C-antibody, 62 ± 2% (day 5) and 39 ± 1% (day 8) biotinylated rbc were detected in WT mice versus 66 ± 2% (day 5) and 43 ± 2% (day 8) in *Gas6*<sup>-/-</sup> mice, respectively ( $n = 6$ ,  $P = \text{NS}$ ).

**SUPPLEMENTARY NOTE 3:** Since iron reserves are necessary for a sufficient erythropoietic response and iron depletion is a common cause of resistance to Epo, we assessed the mice for iron stores. Perl's staining of BM cytopins revealed adequate iron stores in both WT and *Gas6*<sup>-/-</sup> mice (data not shown). Serum iron levels were also within the normal range (data not shown). In addition, BM histology revealed normal stainable iron stores in both WT and *Gas6*<sup>-/-</sup> mice (not shown). Thus, the impaired erythropoietic response in anemic *Gas6*<sup>-/-</sup> mice, in spite of elevated Epo levels (see Supplementary Note 4), was not attributable to iron deficiency.

**SUPPLEMENTARY NOTE 4:** Since maturation and proliferation of erythroid progenitors, as well as the generation of early erythroblasts are largely dependent on Epo (2), we considered whether the impaired erythropoietic response of *Gas6*<sup>-/-</sup> mice might be due to insufficient Epo production. In baseline conditions, serum Epo protein levels were undetectable in both genotypes (< 20 mIU/ml). Remarkably, after PHZ-induced hemolysis, serum Epo levels were higher in *Gas6*<sup>-/-</sup> than WT mice (mIU/ml: 53 ± 12 and 25 ± 0.5 in WT mice versus 440 ± 120 and 165 ± 50 in *Gas6*<sup>-/-</sup> mice at day 3 and 6 after PHZ, respectively;  $n = 4-7$ ,  $P < 0.05$ ). Thus, *Gas6*<sup>-/-</sup> mice displayed higher erythropoietin levels at day 3 and 6 after acute hemolysis than WT mice because they were more anemic at these time points (Figure 2a).

**SUPPLEMENTARY NOTE 5:** RBCs were biotinylated in vivo in WT and *Gas6*<sup>-/-</sup> mice. rGas6 was administered from day 0 to day 8 (2 µg/day, i.p.). On day 0, autoimmune hemolytic anemia was induced by intraperitoneal injection of 200 µg purified anti-RBC 34-3C IgG2a (29). At 5 and 8 days after administration of rGas6 and anti-RBC antibodies, respectively, the percentage of biotinylated RBCs was 53 ± 3% and 39 ± 2% in WT mice versus 55 ± 7% and 37 ± 2% in *Gas6*<sup>-/-</sup> mice ( $n = 6$ ,  $P = \text{NS}$ ), indicating that the clearance rate of biotinylated RBCs during acute hemolytic anemia was comparable in *Gas6*<sup>-/-</sup> than WT mice in presence of rGas6 (see also Supplementary note 2).

56. Watanabe, K., et al. 1994. Reticulocyte maturity as an indicator for estimating qualitative abnormality of erythropoiesis. *J. Clin. Pathol.* 47:736–739.

## SUPPLEMENTARY FIGURES

**SUPPLEMENTARY FIGURE 1:** Impaired erythropoiesis in *Gas6*<sup>-/-</sup> mice (red lines) as compared to WT mice (black lines) on a 100% C57BL/6 background in response to phenylhydrazine induced anemia (injection on day 0 and 1).

**SUPPLEMENTARY FIGURE 2:** Therapeutic potential of recombinant Gas6 in acute anemia induced by blood loss.

After bleeding (500  $\mu$ l on day 0 and 500  $\mu$ l on day 1), WT mice were treated with saline (control), recombinant human Gas6 (rGas6, 2  $\mu$ g daily intraperitoneally) or recombinant human erythropoietin (Epo, 10 IU every second day intraperitoneally). The erythropoietic response was monitored by determining the hematocrit levels. Hematocrit levels are expressed as mean  $\pm$  SEM ( $n = 6$  mice) in all panels. \*,  $P < 0.001$ .

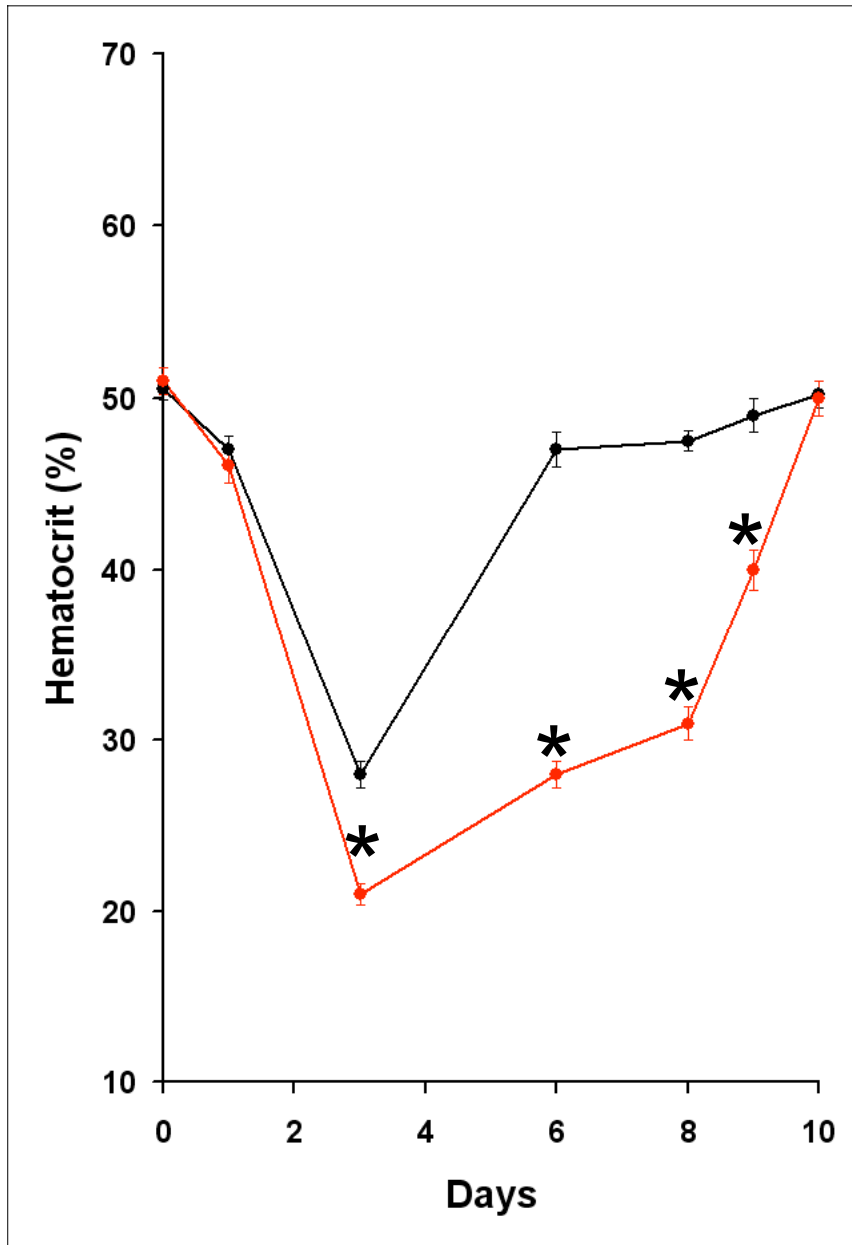

**Supplementary Fig. 1**

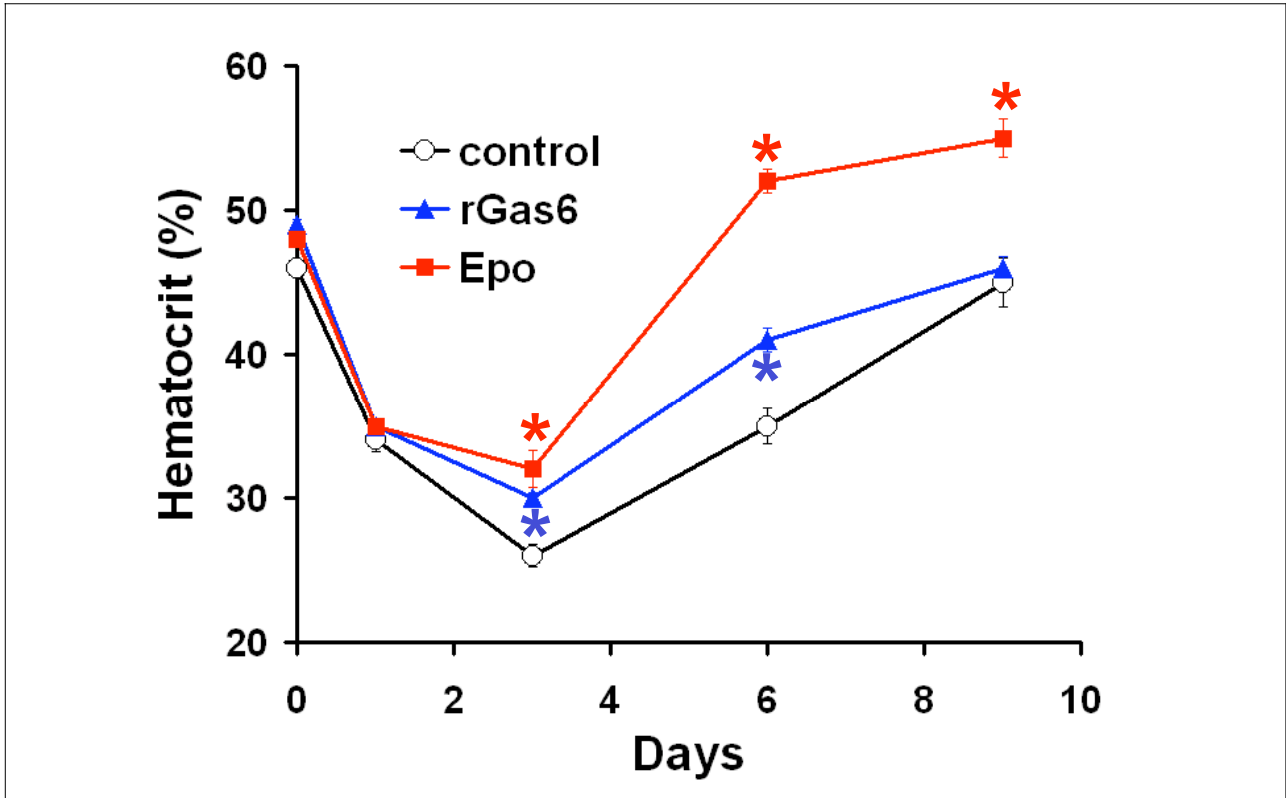

**Supplementary Fig. 2**
